# Supplementary material for: GABA and fermented litchi juice enriched with GABA promote the beneficial effects in ameliorating obesity by regulating the gut microbiota in HFD-induced mice
Source: Royal Society of Chemistry journal article supplement (doi:10.1039/d2fo04038g), 2023-01-01
Supplement: d2fo04038g1.pdf [file d2fo04038g1.pdf]

**Supplementary Table 1** Physicochemical parameters in litchi juice (LJ) and fermented litchi juice (FLJ)

| Basic indicators           | LJ          | FLJ          |
|----------------------------|-------------|--------------|
| Viable count (log CFU/mL)  | \           | 9.25 ± 0.10* |
| GABA (mg/100 mL)           | 108 ± 4     | 125 ± 6*     |
| Total carbohydrate (mg/mL) | 194 ± 5     | 154 ± 6*     |
| Glucose (mg/mL)            | 90 ± 4      | 76 ± 1.3*    |
| Fructose (mg/mL)           | 108 ± 5     | 90 ± 1.5*    |
| Sucrose (mg/mL)            | 43.5 ± 0.8  | 11.9 ± 0.4*  |
| Titrateable acid (mg/mL)   | 1.23 ± 0.03 | 7.63 ± 0.24* |
| pH                         | 5.39 ± 0.07 | 3.70 ± 0.01* |
| Total phenolics (mg/mL)    | 0.65 ± 0.12 | 0.67±0.13    |
| Soluble protein (mg/mL)    | 1.24 ± 0.02 | 1.02 ± 0.5   |

Values are expressed as mean ± SD, n=3; \**p* < 0.05, compared with LJ

5

**Supplementary Table 2** Composition of the experimental diets.

| Nutrition component | Ingredient        | D12450B        |                  | D12492         |                  |
|---------------------|-------------------|----------------|------------------|----------------|------------------|
|                     |                   | Content (g/kg) | Calories (kcal%) | Content (g/kg) | Calories (kcal%) |
| Protein             | Casein            | 200            | 20               | 200            | 20               |
|                     | L-cystine         | 3              |                  | 3              |                  |
| Carbohydrates       | Corn starch       | 315            | 70               | 0              | 20               |
|                     | Maltodextrin      | 35             |                  | 125            |                  |
|                     | Sucrose           | 350            |                  | 6808           |                  |
|                     | Cellulose         | 50             |                  | 50             |                  |
| Fat                 | Soya-bean oil     | 25             | 10               | 25             | 60               |
|                     | Lard oil          | 20             |                  | 245            |                  |
|                     | Mineral           | 10             |                  | 10             |                  |
| Others              | Hydroxyapatite    | 13             |                  | 13             |                  |
|                     | Calcium carbonate | 5.5            |                  | 5.5            |                  |
|                     | Potassium citrate | 16.5           |                  | 16.5           |                  |
|                     | Vitamin           | 10             |                  | 10             |                  |
|                     | Choline tartrate  | 2              |                  | 2              |                  |
|                     | Total calories    |                | 3.85             |                | 5.24             |

6

7

8 **Supplementary Table 3** Representative MS fragments of the major phenolic acids in litchi juice  
 9 (LJ) and fermented litchi juice (FLJ).

| Peak no. | RT<br>(min) | Compound name             | Formula                                        | Mass<br>(m/z) | LJ (ng/mL)   | FLJ (ng/mL)  |
|----------|-------------|---------------------------|------------------------------------------------|---------------|--------------|--------------|
| 1        | 0.92        | Gallic acid               | C <sub>7</sub> H <sub>6</sub> O <sub>5</sub>   | 170.02        | 69.40±0.97   | 39.62±2.09   |
| 2        | 1.09        | Phenylalanine             | C <sub>9</sub> H <sub>11</sub> NO <sub>2</sub> | 165.08        | 36.24±3.44   | 14.89±5.03   |
| 3        | 1.83        | 3,4-Dihydroxybenzoic acid | C <sub>7</sub> H <sub>6</sub> O <sub>4</sub>   | 154.03        | 366.99±14.16 | 201.33±21.45 |
| 4        | 3.08        | Protocatechualdehyde      | C <sub>7</sub> H <sub>6</sub> O <sub>3</sub>   | 138.03        | 428.06±0.14  | 293.57±36.31 |
| 5        | 3.30        | 4-Hydroxybenzoic acid     | C <sub>7</sub> H <sub>6</sub> O <sub>3</sub>   | 138.03        | 130.27±15.87 | 82.09±3.24   |
| 6        | 4.07        | Vanillic acid             | C <sub>8</sub> H <sub>8</sub> O <sub>4</sub>   | 168.04        | 49.35±7.89   | 15.30±1.06   |
| 7        | 4.24        | Caffeic acid              | C <sub>9</sub> H <sub>8</sub> O <sub>4</sub>   | 180.04        | 8.14±0.52    | 8.55±0.34    |
| 8        | 4.44        | Syringic acid             | C <sub>9</sub> H <sub>10</sub> O <sub>5</sub>  | 198.05        | 16.16±1.83   | 10.56±0.40   |
| 9        | 5.03        | Vanillin                  | C <sub>8</sub> H <sub>8</sub> O <sub>3</sub>   | 152.05        | 1.47±0.05    | 0.83±0.07    |
| 10       | 5.23        | p-Hydroxycinnamic acid    | C <sub>9</sub> H <sub>8</sub> O <sub>3</sub>   | 164.05        | 49.72±1.51   | 29.08±0.40   |
| 11       | 5.38        | Syringaldehyde            | C <sub>9</sub> H <sub>10</sub> O <sub>4</sub>  | 182.06        | 2.21±0.28    | 1.73±0.05    |
| 12       | 5.49        | Salicylic acid            | C <sub>7</sub> H <sub>6</sub> O <sub>3</sub>   | 138.03        | 246.58±2.50  | 339.90±5.82  |
| 13       | 5.59        | Trans-Ferulic acid        | C <sub>10</sub> H <sub>10</sub> O <sub>4</sub> | 194.06        | 11.18±0.42   | 5.82±0.04    |
| 14       | 5.64        | Sinapic acid              | C <sub>11</sub> H <sub>12</sub> O <sub>5</sub> | 224.07        | 3.66±0.24    | 2.27±0.14    |
| 15       | 5.92        | Benzoic acid              | C <sub>7</sub> H <sub>6</sub> O <sub>2</sub>   | 122.04        | 246.28±8.20  | 193.29±4.44  |
| 16       | 7.04        | Hydrocinnamic acid        | C <sub>9</sub> H <sub>10</sub> O <sub>2</sub>  | 150.07        | 1.34±0.00    | 2.69±0.45    |
| 17       | 7.15        | Trans-Cinnamic acid       | C <sub>9</sub> H <sub>8</sub> O <sub>2</sub>   | 148.05        | 10.92±0.89   | 5.12±0.07    |
| Total    |             |                           |                                                |               | 1677.98      | 1246.63      |

10

11

12 **Supplementary Table 4** Representative MS fragments of the major flavonoids in litchi juice (LJ)  
13 and fermented litchi juice (FLJ).

| Peak no. | RT<br>(min) | Compound name             | Formula                                         | Mass(m/<br>z) | LJ (ng/mL)     | FLJ (ng/mL)  |
|----------|-------------|---------------------------|-------------------------------------------------|---------------|----------------|--------------|
| 1        | 3.89        | Catechin                  | C <sub>15</sub> H <sub>14</sub> O <sub>6</sub>  | 290.08        | 3.56±0.30      | 17.66±1.18   |
| 2        | 4.76        | L-Epicatechin             | C <sub>15</sub> H <sub>14</sub> O <sub>6</sub>  | 290.08        | 3.61±0.42      | 393.75±7.80  |
| 3        | 4.77        | Dihydromyricetin          | C <sub>15</sub> H <sub>12</sub> O <sub>8</sub>  | 320.05        | 17.68±0.05     | 17.92±0.07   |
| 4        | 5.57        | Rutin                     | C <sub>27</sub> H <sub>30</sub> O <sub>16</sub> | 610.15        | 2303.92±139.50 | 2192.30±8.22 |
| 5        | 5.71        | Quercetin 3-β-D-glucoside | C <sub>21</sub> H <sub>20</sub> O <sub>12</sub> | 464.09        | 2.85±0.33      | 2.89±0.35    |
| 6        | 5.78        | (+)-Dihydroquercetin      | C <sub>15</sub> H <sub>12</sub> O <sub>7</sub>  | 304.06        | 2.70±0.33      | 9.73±0.35    |
| 7        | 6.05        | Kaempferol-3-O-glucoside  | C <sub>21</sub> H <sub>19</sub> O <sub>11</sub> | 448.10        | 8.29±0.28      | 7.00±0.02    |
| 8        | 6.38        | (+)-Dihydrokaempferol     | C <sub>15</sub> H <sub>12</sub> O <sub>6</sub>  | 288.06        | 3.15±0.32      | 7.85±0.04    |
| 9        | 7.00        | Luteolin                  | C <sub>15</sub> H <sub>10</sub> O <sub>6</sub>  | 286.05        | 0.65±0.46      | 0.77±0.21    |
| 10       | 7.03        | Quercetin                 | C <sub>15</sub> H <sub>10</sub> O <sub>7</sub>  | 302.04        | 2.75±0.99      | 8.94±0.55    |
| 11       | 7.52        | Apigenin                  | C <sub>15</sub> H <sub>10</sub> O <sub>5</sub>  | 270.05        | /              | 0.48±0.06    |
| 12       | 7.54        | Naringenin                | C <sub>15</sub> H <sub>12</sub> O <sub>5</sub>  | 272.07        | 0.69±0.06      | 1.13±0.04    |
| 13       | 7.62        | Kaempferol                | C <sub>15</sub> H <sub>10</sub> O <sub>6</sub>  | 286.05        | 0.74±0.39      | 0.99±0.20    |
| 14       | 7.69        | Isorhamnetin              | C <sub>16</sub> H <sub>12</sub> O <sub>7</sub>  | 316.06        | 2.33±0.67      | 3.25±0.04    |
| Total    |             |                           |                                                 |               | 2352.92        | 2664.65      |

14

15

16 **Supplementary Table 5** HPLC autosampler program for OPA derivatization of GABA

| Step | Action           | Vial <sup>a</sup> | Volume (μL) |
|------|------------------|-------------------|-------------|
| 1    | Draw             | 1                 | 10          |
| 2    | Draw             | Sample            | 2           |
| 3    | Mix <sup>b</sup> |                   | 12          |
| 4    | Draw             | 2                 | 0           |
| 5    | Draw             | 3                 | 2           |
| 6    | Mix <sup>c</sup> |                   | 14          |
| 7    | Draw             | 2                 |             |
| 8    | Inject           |                   |             |

17 <sup>a</sup> Vial 1: borate buffer solution; vial 2: rinse solvent(acetonitrile); vial 3: OPA derivatization reagent.

18 <sup>b</sup> In air; default speed; three times.

19 <sup>c</sup> In air; default speed; fifteen times.

20

21 **Supplementary Table 6** HPLC gradient elution program for determination of GABA

| Time/min | Mobile phase/% |    |
|----------|----------------|----|
|          | A              | B  |
| 0        | 90             | 10 |
| 20       | 55             | 45 |
| 25       | 90             | 10 |

22 Notes: solvent A: 25 mM sodium acetate, pH 5.9, solvent B: 100% acetonitrile

23

24

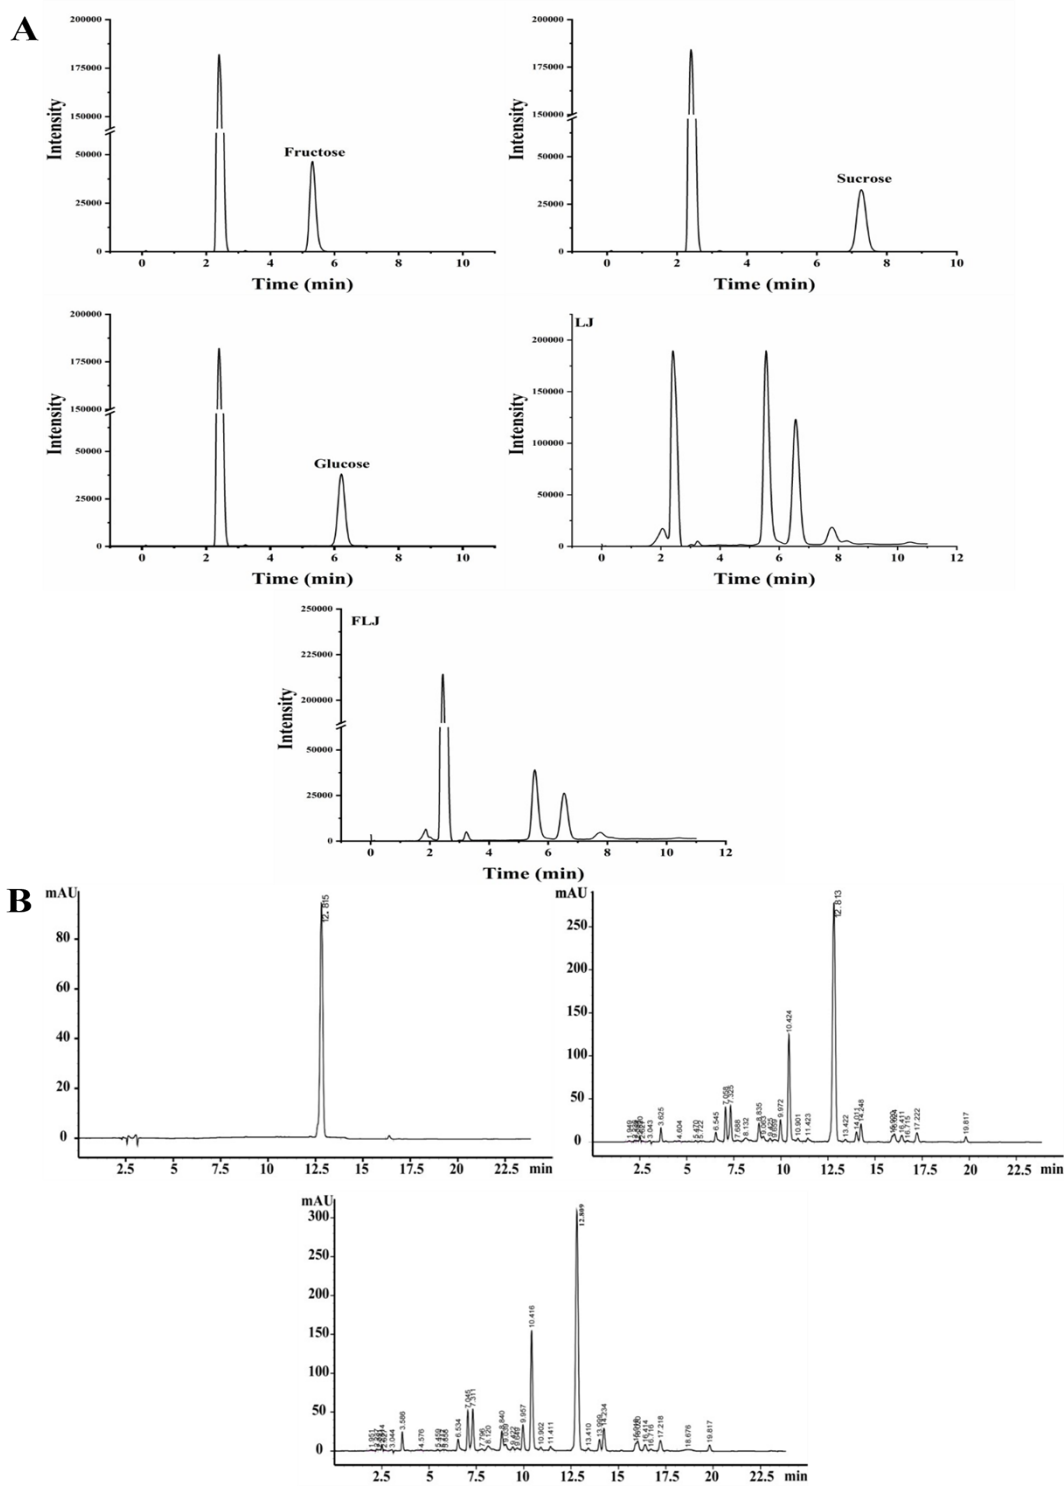

25

26

27 **Supplementary Figure 1.** HPLC analysis of monosaccharides (A) and GABA (B) in litchi juice  
 28 (LJ) and fermented litchi juice (FLJ).

29

---

## 30 **Supplementary methods:**

### 31 **1. Chromatography and MS**

#### 32 **1.1 Chemicals and reagents**

33 Methanol, acetonitrile, acetic acid was purchased from ANPEL. All solvents were  
34 of LC-MS grade. Sodium hydroxide, hydrochloric acid, ethyl acetate was purchased  
35 from Sinopharm which were AR Grade. And ultra-pure water in-house prepared using  
36 a Milli-Q water purification system (Millipore, Bedford, MA, USA).

#### 37 **1.2 Sample preparation and extraction**

38 Samples were treated with 2 mL of 4 M aqueous NaOH. The mixed solution was  
39 hydrolyzed at 40 °C for 2 h in a gas bath with shaking and protection from light. The  
40 pH value was adjusted to 2 by adding 4 M aqueous HCl. The mixture was shaken with  
41 2 mL of n-hexane at room temperature for 20 min to remove the n-hexane layer. Ethyl  
42 acetate (2 × 2 mL) was used to extract the aqueous layer, and the mixed extracts were  
43 concentrated to nearly dry on a rotary evaporator at 35 °C under reduced pressure.  
44 Before analysis, the residue was dissolved in 200 µl of 50% methanol/water and  
45 transferred to insert-equipped vials.

#### 46 **1.3 UPLC Conditions**

47 The sample extracts were analyzed using an UPLC– Orbitrap-MS system (UPLC,  
48 Vanquish; MS, QE). The analytical conditions were as follows, UPLC: column, Waters  
49 ACQUITY UPLC HSS T3(1.8 µm, 2.1 mm\*50 mm); column temperature, 40 °C; flow  
50 rate, 0.3 mL/min; injection volume, 2µL; solvent system, water (0.1% acetic acid):  
51 acetonitrile (0.1% acetic acid); gradient program, 90:10 V/V at 0 min, 90:10 V/V at 2.0  
52 min, 40:60 V/V at 6.0 min, 40:60 V/V at 8.0 min, 90:10 V/V at 8.1 min, 90:10 V/V at  
53 12.0 min.

#### 54 **1.4 QE**

55 HRMS data were recorded on a Q Exactive hybrid Q–Orbitrap mass spectrometer  
56 equipped with a heated ESI source (Thermo Fisher Scientific) utilizing the Full MS  
57 acquisition methods. The ESI source parameters were set as follows: spray voltage, -  
58 2.8 kV; sheath gas pressure, 40 arb; aux gas pressure, 10 arb; sweep gas pressure, 0 arb;  
59 capillary temperature, 320 °C; and aux gas heater temperature, 350 °C.



---

## 60 1.5 Data analysis and interpretation

61 Data were acquired on the Q-Exactive using Xcalibur 4.1 (Thermo Scientific), and  
62 processed using TraceFinder™4.1 Clinical (Thermo Scientific). Quantified data were  
63 output into Excel format.

## 64 2. Measurement of GABA contents

65 GABA contents were determined by HPLC (Agilent Technologies 1260 Infinity  
66 II, Santa Clara, CA, USA) equipped with a Zorbax SB-C18 column (4.6 mm × 250 mm,  
67 5 µm, Nacalai Tesque, Japan), using the method described by Moret et al. (2005) with  
68 some modification. The samples of fermented litchi juice were centrifuged at 10,000×g  
69 for 10 min. The resulting supernatants were filtered through a membrane filter (0.22  
70 µm) and the filtrate was used for HPLC analysis. Pre-column derivatization of samples  
71 was performed using the Agilent automated derivatization protocol with O-  
72 phthalaldehyde (OPA, Sigma Chemical Industries, Ltd., Saint Louis, MO, USA), and  
73 boric acid (pH 10.4) serving as buffer. Use of the Agilent automatic derivatization  
74 injection program (Supplementary Table S5) was as follows: 10 µL of boric acid buffer  
75 and 2 µL of the sample were combined and mixed 3 times, the injection needle was  
76 washed for 3 s with acetonitrile, 2 µL of the OPA derivatization reagent was added, the  
77 injection needle was rewashed for 3 s with acetonitrile, and the 14 µL volume consisting  
78 of sample, buffer and derivation reagent was mixed 15 times. Sample separation was  
79 accomplished using a gradient program (Supplementary Table S6) consisting of mobile  
80 phase [solvent A: 25 mM sodium acetate, pH 5.9, solvent B: 100% acetonitrile] with a  
81 flow rate of 1 mL/min in a column held at 40 °C. The OPA derivatives of GABA were  
82 detected by a UV detector at 323 nm. The GABA contents were quantified based on  
83 integrated peak area in comparison with standard curves prepared from known  
84 concentrations of GABA standard.

85

86
